# Supplementary material for: Direct Cardiac Actions of the Sodium Glucose Co‐Transporter 2 Inhibitor Empagliflozin Improve Myocardial Oxidative Phosphorylation and Attenuate Pressure‐Overload Heart Failure
Source: PubMed Central journal article supplement — J Am Heart Assoc. 2021 Mar 13;10(6):e018298. doi: 10.1161/JAHA.120.018298 (PMC8174202; doi:10.1161/jaha.120.018298), 2021-03-13
Supplement: JAH3-10-e018298-s001.pdf [file JAH3-10-e018298-s001.pdf]

# **Supplemental Material**

## **Data S1.**

### **Supplemental Materials and Methods**

#### **Body weight and body composition analysis**

Body weight were measured weekly, while food and water intakes and 24-hour urine were measure at the end of experiments. Body composition measurements were performed weekly using magnetic resonance imaging (EchoMRI-900TM, Echo Medical System, Houston, TX) to quantify lean mass, fat mass, and free water and total water content in conscious mice. The hydration ratio was calculated as  $\text{Hydration\%} = (\text{Total Water} - \text{Free Water}) / \text{Lean} \times 100\%$ .

#### **Blood pressure measurements**

We measured the systemic arterial pressure and intra-ventricular pressure using Millar catheter (SPR-839). At the end of the protocol, the mice were anesthetized by urethane (1000 mg/kg, i.p.). The systemic pressure was measured through left carotid artery and the intra-ventricular pressure was measured through the apex.

#### **Serum ketone body measurements**

The serum of mice from different groups were collected at the end of the protocol. The ketone body was measured following the manufacturer's instructions (beta Hydroxybutyrate Assay Kit, Abcam, ab83390).

**Table S1. Fasting blood glucose and cardiac remodeling results.**

| Parameter                                   | Sham        | Sham + EMPA | TAC          | TAC + EMPA   |
|---------------------------------------------|-------------|-------------|--------------|--------------|
| FBG at Week 0 (mg/dL)                       | 91.8±11.9   | 97.6±5.9    | 91.1±6.4     | 90.0±3.4     |
| FBG at Week 2 (mg/dL)                       | 89.2±7.1    | 100.1±4.4   | 99.9±3.9     | 111.8±2.7    |
| FBG at Week 4 (mg/dL)                       | 104.6±5.0   | 107.3±7.3   | 115.1±9.2    | 114.6±9.1    |
| FBG at Week 6 (mg/dL)                       | 98.8±8.6    | 101.7±6.0   | 120.5±6.7    | 114.7±8.5    |
| Heart weight/tibia length                   | 19.36±1.03  | 22.19±0.51  | 37.55±4.68*  | 26.25±2.00†  |
| Lung weight/tibia length                    | 20.32±0.45  | 17.43±0.54  | 26.48±2.17*  | 21.06±0.49†  |
| BNP (fold)                                  | 1±0.08      | 1.11±0.05   | 1.72±0.15*   | 1.37±0.10†   |
| Cross sectional area in WGA staining (fold) | 1±0.13      | 0.92±0.04   | 2.58±0.18*   | 1.54±0.09†   |
| Masson staining                             | 0.008±0.007 | 0.008±0.007 | 0.136±0.026* | 0.029±0.012† |

Results are expressed as means ± SEM. FBG: n=10-19 per group; others: n=6 per group.

\*p<0.05 vs. sham group, †p<0.05 vs. TAC group. One-way ANOVA (non-repeated measures).

FBG, fasting blood glucose; EMPA, empagliflozin; TAC, transverse aortic constriction; BNP, brain natriuretic peptide; WGA, wheat germ agglutinin.

**Table S2. Cardiac function by echocardiography.**

| Parameter             | Sham        | Sham + EMPA | TAC          | TAC + EMPA   |
|-----------------------|-------------|-------------|--------------|--------------|
| Ejection fraction %   | 62.1±1.6    | 66.1±1.8    | 40.2±3.2*    | 51.3±3.8†    |
| Fraction shortening % | 33.1±1.1    | 35.9±1.4    | 18.4±1.4*    | 28.7±4.0†    |
| Cardiac output ml/min | 22.9±1.3    | 18.9±1.6    | 13.3±1.4*    | 18.9±1.9†    |
| LVPWd                 | 0.74±0.04   | 0.83±0.04   | 1.02±0.05*   | 0.85±0.05†   |
| MPI                   | 0.51±0.07   | 0.65±0.04   | 0.87±0.08*   | 0.61±0.03†   |
| E/A ratio             | 1.62±0.15   | 1.85±0.36   | 4.51±1.24*   | 1.80±0.33†   |
| GCS%                  | -23.36±1.51 | -25.73±1.53 | -11.17±1.12* | -18.17±2.07† |

Results are expressed as means ± SEM. n=5-6 per group. \*p<0.05 vs. sham group, †p<0.05 vs. TAC group. One-way ANOVA (non-repeated measures). EMPA, empagliflozin; TAC, transverse aortic constriction; LVPWd, the end-diastolic left ventricular posterior wall thickness; MPI, myocardial performance index; E/A, E peak / A peak; GCS, global circumferential strain.

**Table S3. Mice exercise capacity results.**

| Parameter                    | Sham        | Sham + EMPA  | TAC           | TAC + EMPA    |
|------------------------------|-------------|--------------|---------------|---------------|
| Running time (min)           | 21.3±0.9    | 20.4±0.9     | 10.8±1.3*     | 14.7±1.2†     |
| VO <sub>2</sub> (ml/kg/hr)   | 8089.0±88.4 | 7514.0±136.6 | 5518.0±368.6* | 6681.0±156.9† |
| Lactate: Resting (mmol/L)    | 1.9±0.1     | 1.5±0.3      | 2.7±0.3*      | 1.7±0.2†      |
| Lactate: Exhaustion (mmol/L) | 7.7±0.7     | 8.0±0.9      | 11.7±1.1*     | 8.4±1.0†      |

Results are expressed as means ± SEM. n=5-6 per group. \*p<0.05 vs. sham group, †p<0.05 vs. TAC group. One-way ANOVA (non-repeated measures) and two-way ANOVA (repeated measures). EMPA, empagliflozin; TAC, transverse aortic constriction; VO<sub>2</sub>, oxygen consumption.

**Table S4. Results of isolated cardiomyocytes.**

| Parameter                              | Sham               | Sham + EMPA        | TAC                 | TAC + EMPA          |
|----------------------------------------|--------------------|--------------------|---------------------|---------------------|
| Resting Sarc. length ( $\mu\text{m}$ ) | 1.815 $\pm$ 0.007  | 1.767 $\pm$ 0.017  | 1.757 $\pm$ 0.008   | 1.746 $\pm$ 0.007   |
| Peak $\Delta$ Length ( $\mu\text{m}$ ) | 0.169 $\pm$ 0.008  | 0.174 $\pm$ 0.008  | 0.102 $\pm$ 0.011*  | 0.137 $\pm$ 0.008†  |
| Peak shortening %                      | 9.32 $\pm$ 0.42    | 9.81 $\pm$ 0.41    | 5.80 $\pm$ 0.64*    | 7.86 $\pm$ 0.46†    |
| -dl/dt (um/sec)                        | -2.625 $\pm$ 0.215 | -2.350 $\pm$ 0.116 | -1.371 $\pm$ 0.112* | -1.764 $\pm$ 0.106† |
| +dl/dt (um/sec)                        | 2.053 $\pm$ 0.141  | 1.841 $\pm$ 0.137  | 0.919 $\pm$ 0.103*  | 1.260 $\pm$ 0.083†  |
| Baseline Calcium Signal (F340/380)     | 0.936 $\pm$ 0.032  | 0.957 $\pm$ 0.035  | 0.928 $\pm$ 0.013   | 0.948 $\pm$ 0.021   |
| dF/dt( $\Delta$ F340/380/sec)          | 1.489 $\pm$ 0.201  | 1.410 $\pm$ 0.094  | 0.743 $\pm$ 0.165*  | 1.531 $\pm$ 0.262†  |
| -dF/dt( $\Delta$ F340/380/sec)         | -0.313 $\pm$ 0.041 | -0.266 $\pm$ 0.024 | -0.152 $\pm$ 0.021* | -0.306 $\pm$ 0.052† |
| Peak Calcium Signal                    | 0.057 $\pm$ 0.007  | 0.055 $\pm$ 0.004  | 0.029 $\pm$ 0.006*  | 0.062 $\pm$ 0.009†  |
| %Peak Calcium Signal                   | 6.01 $\pm$ 0.72    | 5.76 $\pm$ 0.55    | 3.16 $\pm$ 0.57*    | 6.51 $\pm$ 0.95†    |

Results are expressed as means  $\pm$  SEM. n=5-6 per group. \*p<0.05 vs. sham group, †p<0.05 vs. TAC group. One-way ANOVA (non-repeated measures). EMPA, empagliflozin; TAC, transverse aortic constriction; Sarc., sarcomere.

**Table S5. Cardiac metabolism and function of isolated perfused hearts.**

| Parameter                                                     | Sham             | Sham + EMPA      | TAC              | TAC + EMPA        |
|---------------------------------------------------------------|------------------|------------------|------------------|-------------------|
| Glucose oxidation ( $\mu\text{mol}/\text{min}/\text{g dry}$ ) | 1.41 $\pm$ 0.19  | 1.77 $\pm$ 0.20  | 0.53 $\pm$ 0.05* | 1.00 $\pm$ 0.08†  |
| Oleate oxidation ( $\mu\text{mol}/\text{min}/\text{g dry}$ )  | 0.25 $\pm$ 0.04  | 0.29 $\pm$ 0.03  | 0.14 $\pm$ 0.01* | 0.21 $\pm$ 0.02†  |
| Glucose uptake ( $\mu\text{mol}/\text{min}/\text{g dry}$ )    | 7.53 $\pm$ 1.19  | 2.87 $\pm$ 0.48  | 5.01 $\pm$ 0.70* | 2.43 $\pm$ 0.37†  |
| Glycolysis ( $\mu\text{mol}/\text{min}/\text{g dry}$ )        | 4.86 $\pm$ 0.90  | 2.39 $\pm$ 0.47  | 4.99 $\pm$ 0.96* | 2.09 $\pm$ 0.73†  |
| Cardiac output (ml/min)                                       | 12.36 $\pm$ 0.05 | 12.57 $\pm$ 0.15 | 8.92 $\pm$ 0.21* | 10.72 $\pm$ 0.15† |
| Heart rate (beats/min)                                        | 367.6 $\pm$ 14.9 | 386.4 $\pm$ 22.8 | 328.8 $\pm$ 25.9 | 383.4 $\pm$ 20.8  |

Results are expressed as means  $\pm$  SEM. n=5-6 per group. \*p<0.05 vs. sham group, †p<0.05 vs. TAC group. One-way ANOVA (non-repeated measures). EMPA, empagliflozin; TAC, transverse aortic constriction.

**Table S6. Results of immunoblotting.**

| Parameter     | Sham      | Sham + EMPA | TAC        | TAC + EMPA |
|---------------|-----------|-------------|------------|------------|
| CD36          | 1.11±0.07 | 0.97±0.17   | 0.48±0.06* | 0.77±0.11† |
| PPAR $\alpha$ | 0.94±0.07 | 1.09±0.04   | 0.18±0.03* | 0.59±0.07† |
| p-AMPK/AMPK   | 0.70±0.08 | 0.72±0.09   | 0.39±0.04* | 1.06±0.07† |
| p-ACC/ACC     | 1.48±0.17 | 1.69±0.14   | 0.81±0.03* | 1.51±0.12† |
| p-mTOR/mTOR   | 1.42±0.15 | 1.49±0.15   | 1.94±0.08* | 1.18±0.09† |
| p-S6/S6       | 1.87±0.58 | 1.38±0.36   | 8.16±1.39* | 2.88±0.51† |

Results are expressed as means  $\pm$  SEM. n=5-6 per group. \*p<0.05 vs. sham group, †p<0.05 vs. TAC group. One-way ANOVA (non-repeated measures). EMPA, empagliflozin; TAC, transverse aortic constriction; CD36, cluster of differentiation 36; PPAR $\alpha$ , Peroxisome proliferator-activated receptor  $\alpha$ ; AMPK, AMP-activated protein kinase; ACC, acetyl-CoA carboxylase; mTOR, mammalian target of rapamycin.



**Table S7. Acute treatment of EMPA in isolated hearts.**

| Parameter                                                          | Vehicle             | EMPA                 |
|--------------------------------------------------------------------|---------------------|----------------------|
| Mean glucose uptake<br>( $\mu\text{mol}/\text{min}/\text{g dry}$ ) | 5.36 $\pm$ 0.31     | 3.76 $\pm$ 0.40*     |
| Mean glycolysis<br>( $\mu\text{mol}/\text{min}/\text{g dry}$ )     | 4.61 $\pm$ 0.22     | 3.01 $\pm$ 0.37*     |
| Mean RPP (mmHg/min)                                                | 27831.0 $\pm$ 814.7 | 28289.0 $\pm$ 2589.0 |

Results are expressed as means  $\pm$  SEM. n=6 per group. \*p<0.05 vs. Vehicle. Mann-Whitney test. EMPA, empagliflozin; TAC, transverse aortic constriction; RPP, rate pressure product.

**Figure S1. Chronic EMPA treatment for 4 weeks did not significantly alter daily food intake or 24-hour urine volume.**

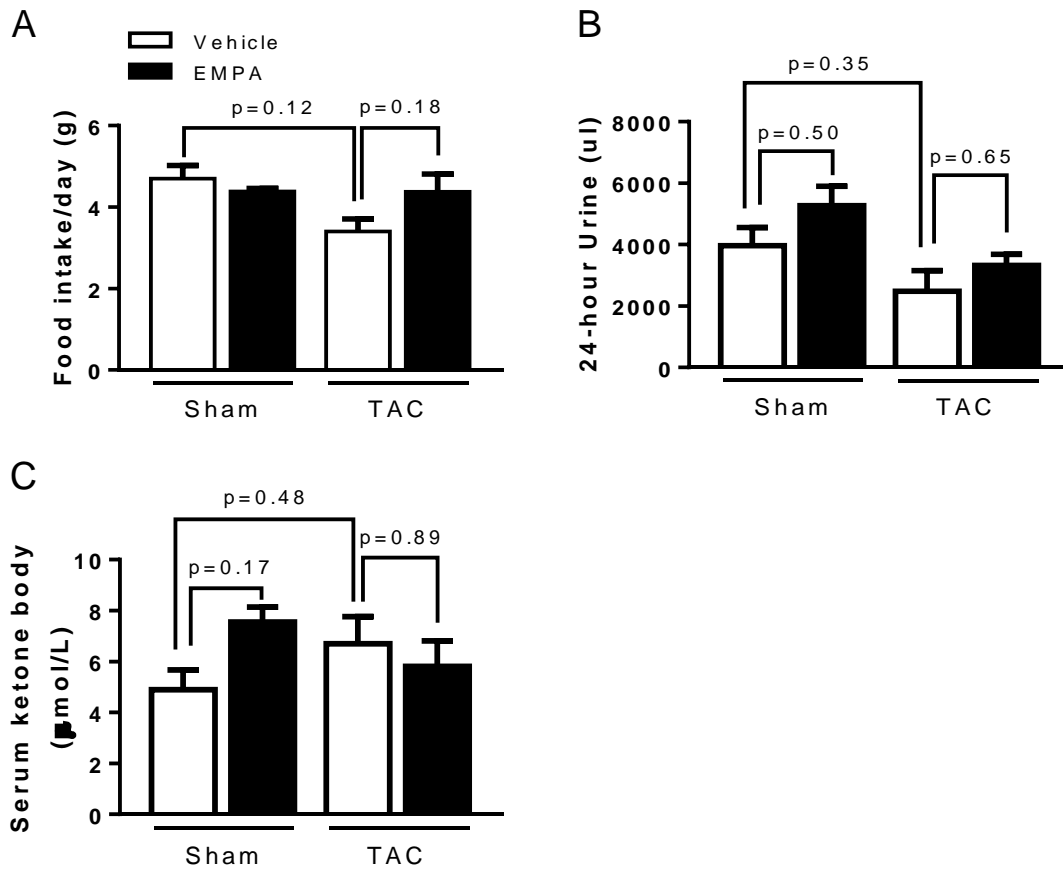

The EMPA or placebo was given to mice 2 weeks after sham or TAC surgeries. After giving EMPA for 4 weeks, we measured the average daily food intake (**A**) and 24-hour urine volume (**B**) for these mice. N=4-8 in each group. (**C**) Serum ketone body concentrations in different groups. N=7 mice per group. Results are expressed as mean  $\pm$  SEM. Comparisons among groups were performed using Dunn's multiple comparison test. EMPA, empagliflozin; TAC, transverse aortic constriction; SEM, standard error of the mean.

**Figure S2. Empagliflozin treatment did not significantly influence normalized body weight, fat, hydration and total water in sham or TAC groups.**

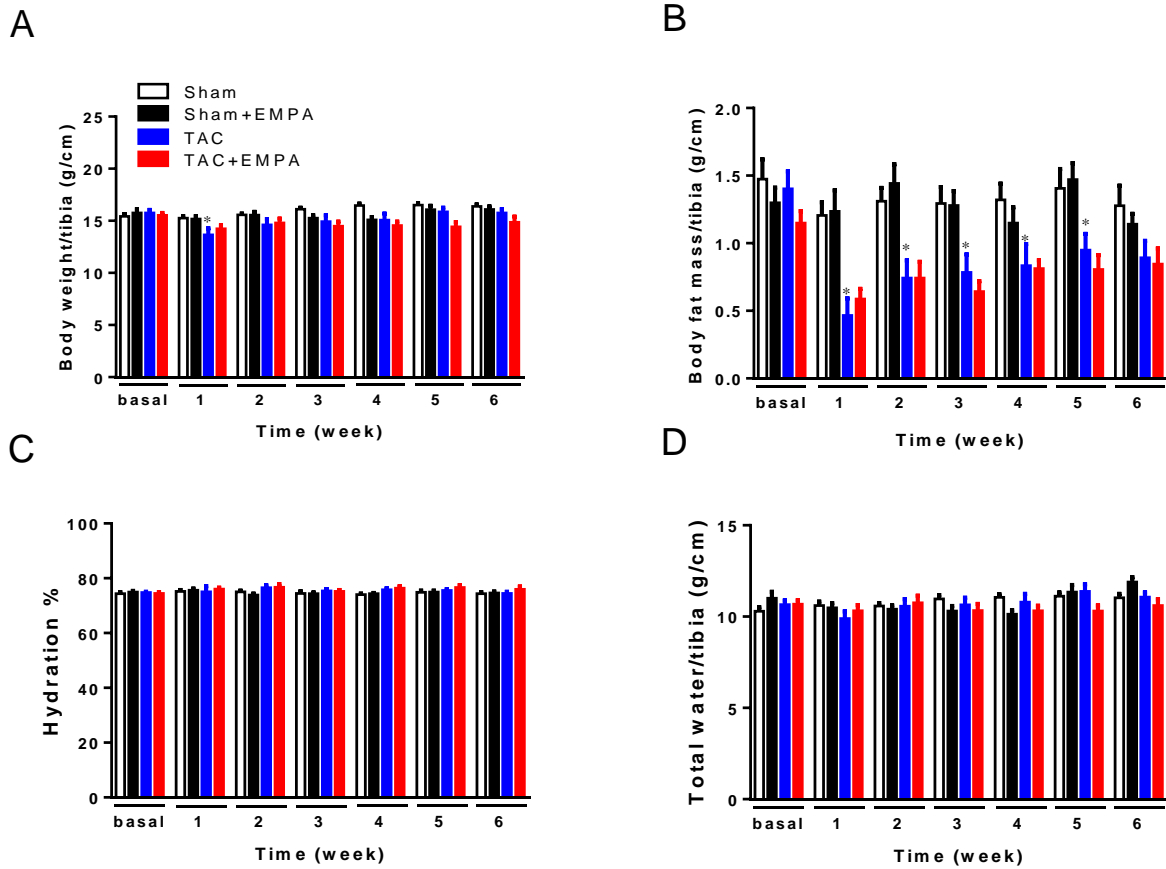

**(A)** Body weight normalized by tibia length over 6 weeks; **(B)** body fat normalized by tibia length; **(C)** percentage of hydration; **(D)** total body water normalized by tibia length. Results are expressed as mean  $\pm$  SEM.  $n=10-15$  in each group.  $*p<0.05$  vs. corresponding sham group. Two-way ANOVA (non-repeated measures) **(A-D)**. EMPA, empagliflozin; TAC, transverse aortic constriction; SEM, standard error of the mean.

**Figure S3. Two weeks of TAC induced cardiac hypertrophy, and systolic and diastolic dysfunction.**

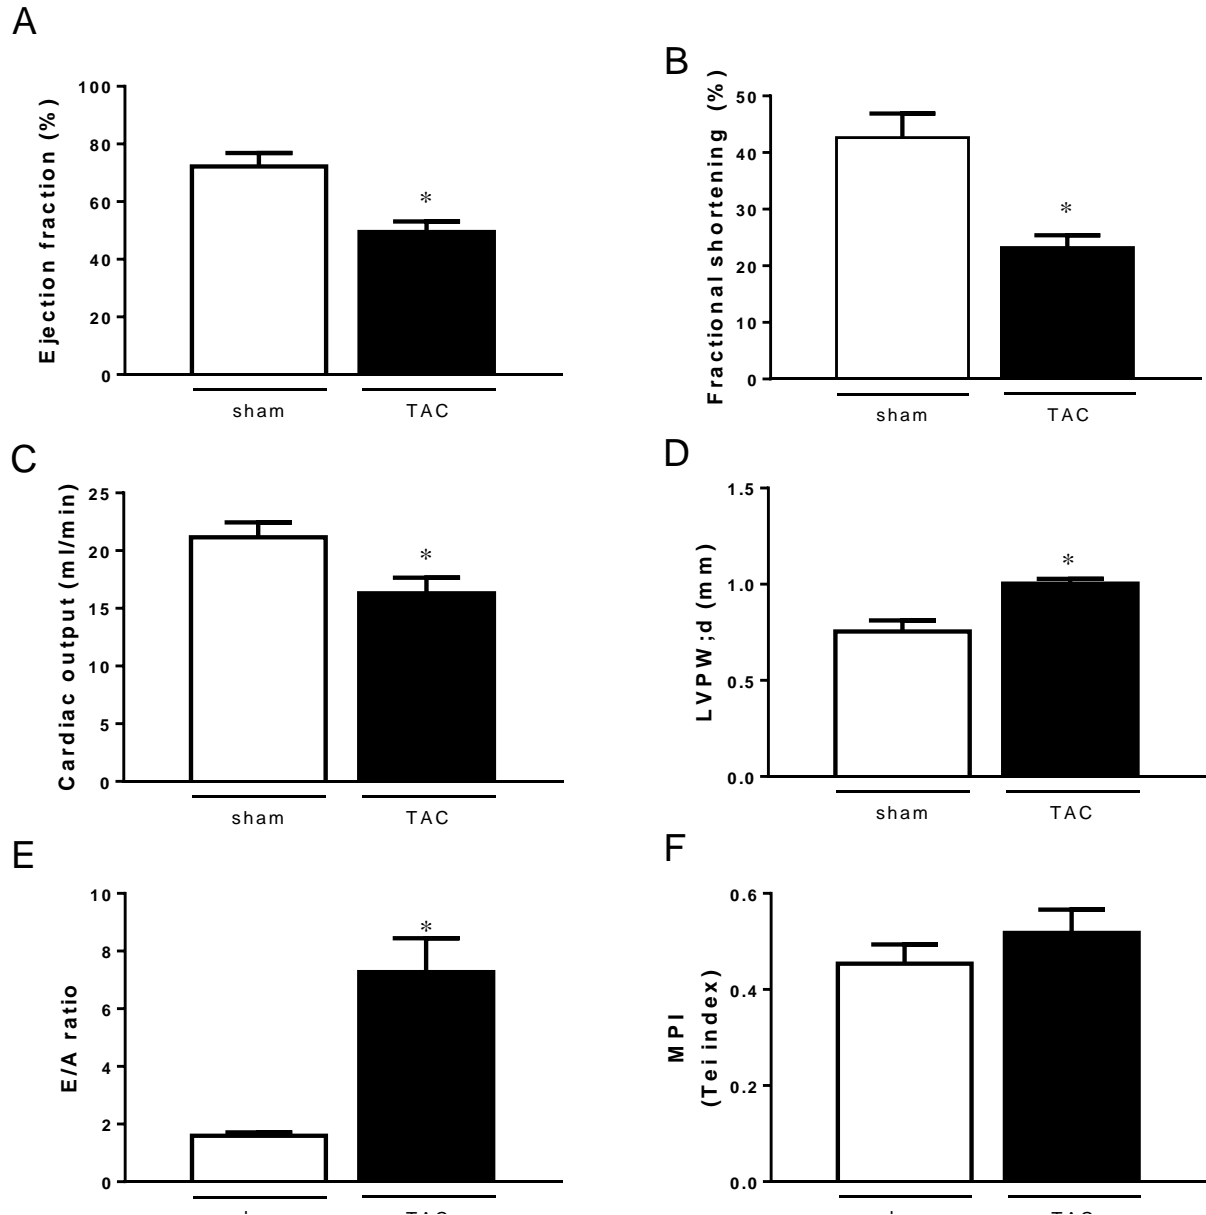

(A) ejection fraction, (B) fraction shortening, (C) cardiac output, (D) LVPWd, (E) E/A ratio, and (F) MPI. Results are expressed as mean  $\pm$  SEM.  $n=10$  in each group. Comparisons between groups were performed using unpaired Student  $t$  test. \* $p<0.05$  vs. sham group. TAC, transverse aortic constriction; LVPWd, the end-diastolic left ventricular posterior wall thickness. MPI, myocardial performance index. SEM, standard error of the mean.

**Figure S4. Empagliflozin treatment did not significantly alter mean systemic arterial pressure or left ventricular pressure (LVP) in sham or TAC groups.**

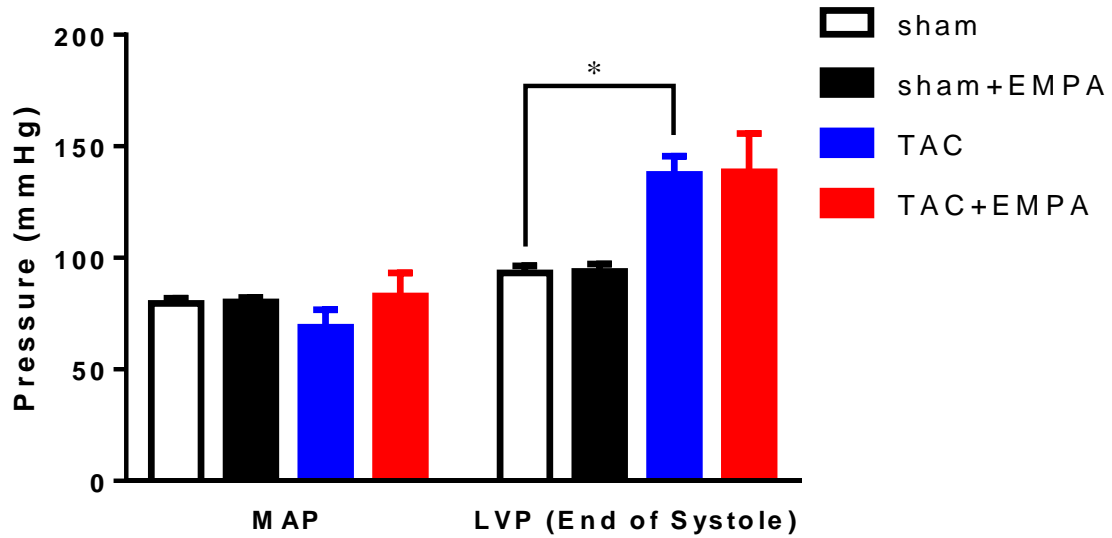

The mean arterial pressure and intra-LVP at the end of systole were measured at the end of the 4-week treatment protocol. Comparisons among groups were performed using one-way ANOVA test (repeated measures). Results are expressed as mean  $\pm$  SEM.  $n=5$  mice per group,  $*p<0.05$  vs. corresponding sham group. MAP, mean arterial pressure; LVP, left ventricular pressure.

**Figure S5. Immunoblotting results of calcium-related pathways.**

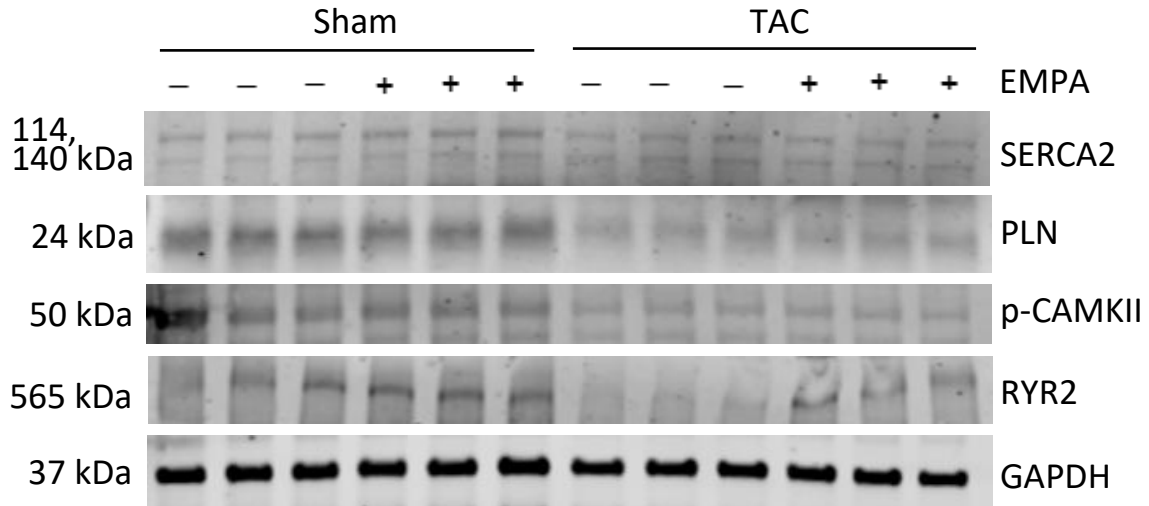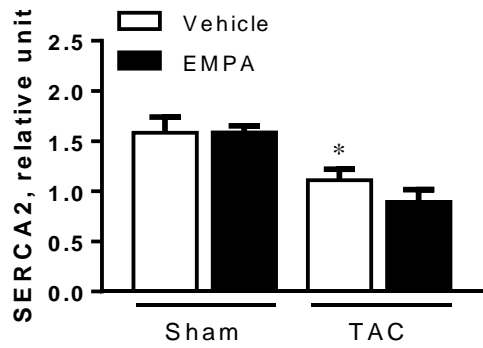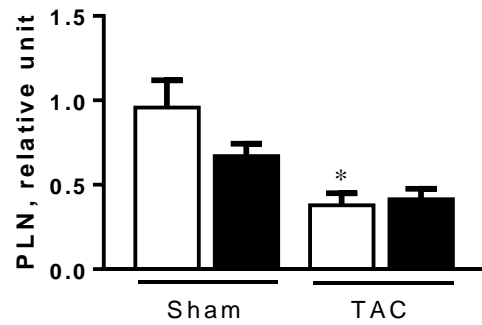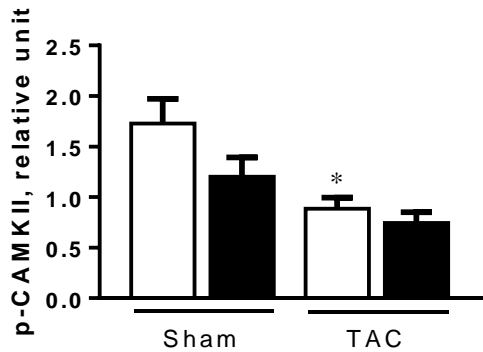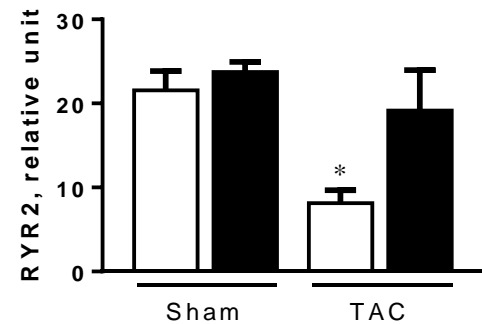

Upper: representative blots of each protein. Lower: results of statistical analysis. Results are expressed as mean  $\pm$  SEM, n=6 mice per group, \*p<0.05 vs. sham, †p<0.05 vs. TAC. One-way ANOVA (non-repeated measures). SERCA, sarco/endoplasmic reticulum Ca<sup>2+</sup>-ATPase; PLN, phospholamban; CAMKII, Calcium/calmodulin-dependent protein kinase II; RYR2, Ryanodine receptor 2; GAPDH, Glyceraldehyde 3-phosphate dehydrogenase.

**Figure S6. Additional results of molecular docking analysis.**

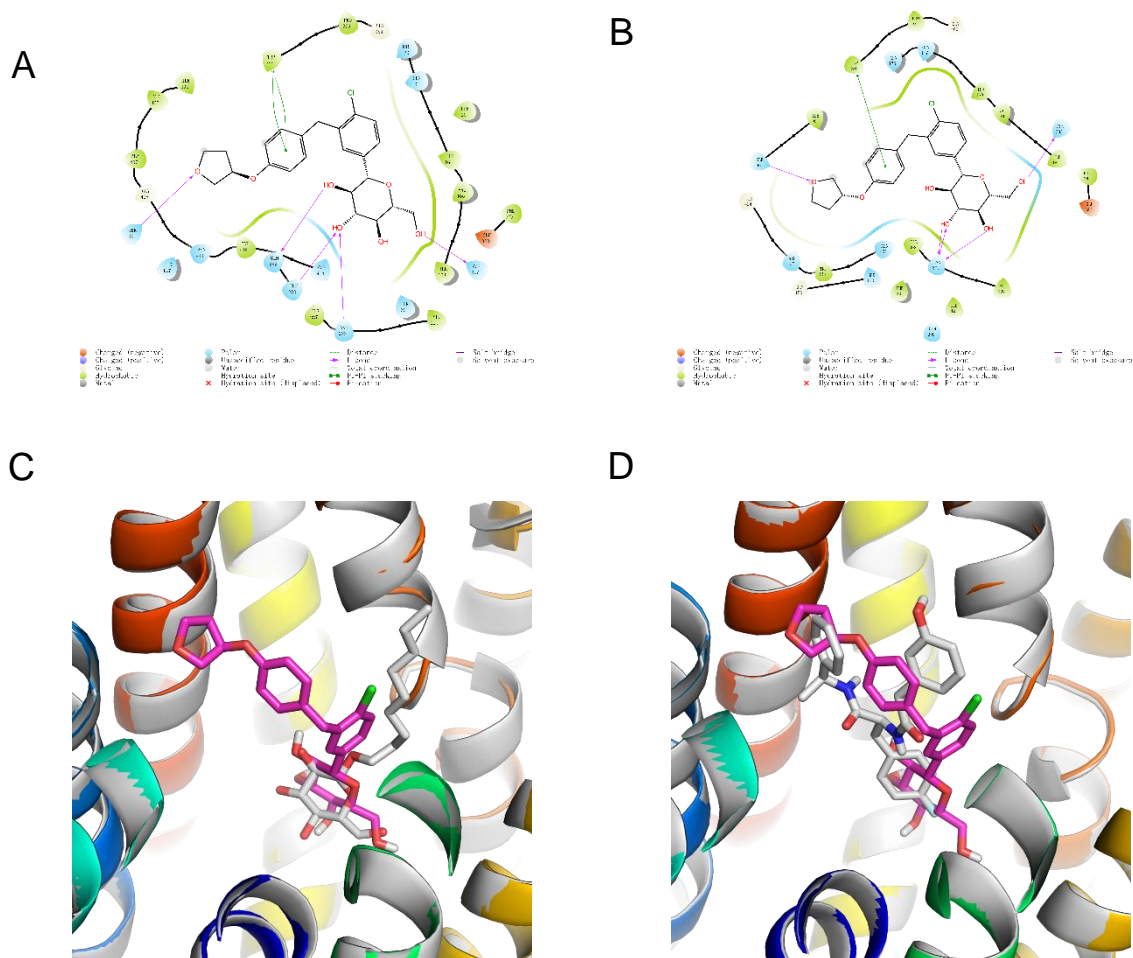

**Figure S7. Acute treatment of EMPA did not alter contractility and calcium homeostasis in isolated cardiomyocytes.**

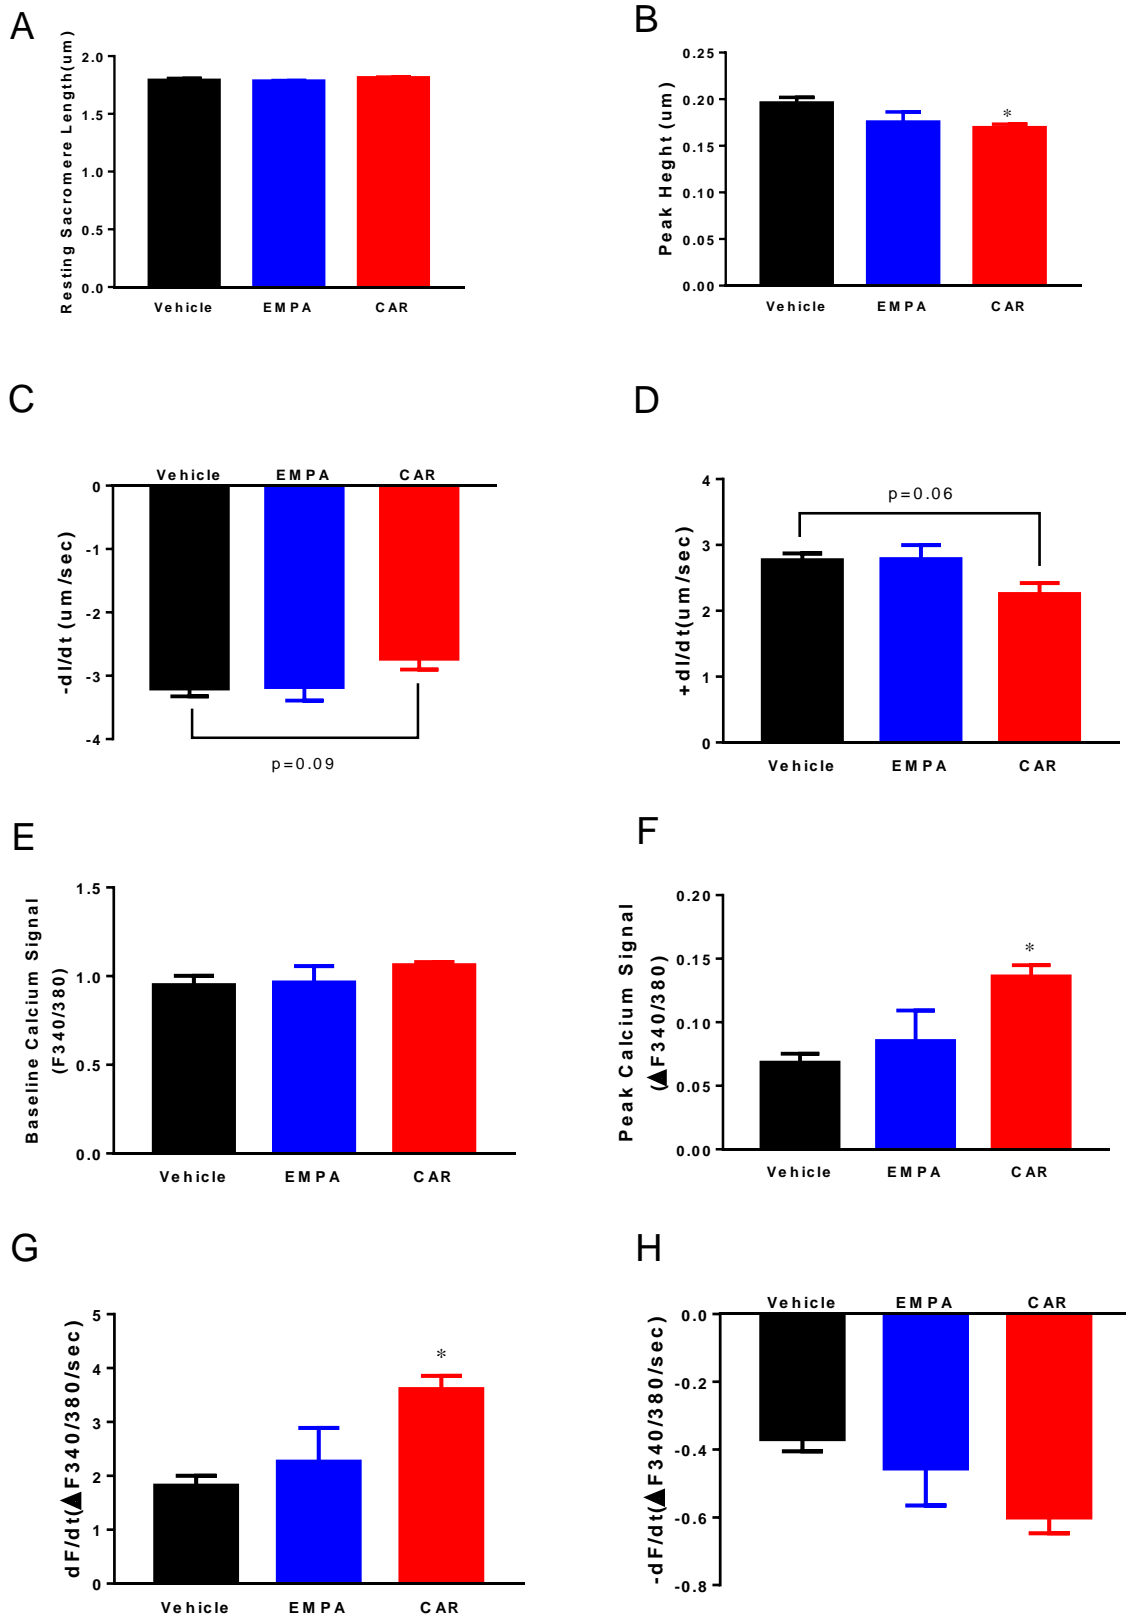



Isolated cardiomyocytes from healthy mice were treated with vehicle, EMPA (0.5 $\mu$ M) or CAR (0.5  $\mu$ M) for 30 min. The contractility was recorded as **(A)** The resting sarcomere length; **(B)** The maximum length changed during action (Peak  $\Delta$ length). **(C)** The maximum velocity of contraction (-dL/dt); **(D)** The maximum velocity of relaxation (+dL/dt); The calcium transient was recorded as **(E)** baseline calcium signal, **(F)** Peak calcium signal, **(G)** maximum velocity of calcium change during contraction (+dF/dt), and **(H)** maximum velocity of calcium change during relaxation(-dF/dt). Results are expressed as mean  $\pm$  SEM, 30 cells/mouse, n=3 in each group. Comparisons among groups were performed using Dunn's multiple comparison test. EMPA, empagliflozin; CAR, cariporide; SEM, standard error of the mean.
